# Supplementary material for: An Effective Strategy to Enhance the Electrocatalytic Activity of Ruddlesden−Popper Oxides Sr3Fe2O7−δ Electrodes for Solid Oxide Fuel Cells
Source: MDPI journal article supplement (doi:10.3390/catal11111400), 2021-11-18
Supplement: s1 [file s1]

Supplementary Materials

# An Effective Strategy to Enhance the Electrocatalytic Activity of Ruddlesden–Popper Oxides $\text{Sr}_3\text{Fe}_2\text{O}_{7-\delta}$ Electrodes for Solid Oxide Fuel Cells

Longsheng Peng, Qiang Li \*, Liping Sun and Hui Zhao \*

Key Laboratory of Functional Inorganic Material Chemistry, Ministry of Education, School of Chemistry and Materials Science, Heilongjiang University, Harbin 150080, China; P021001@hlju.edu.cn (L.P.); sunliping@hlju.edu.cn (L.S.)

\* Correspondence: liqiang@hlju.edu.cn (Q.L.); zhaohui@hlju.edu.cn (H.Z.)

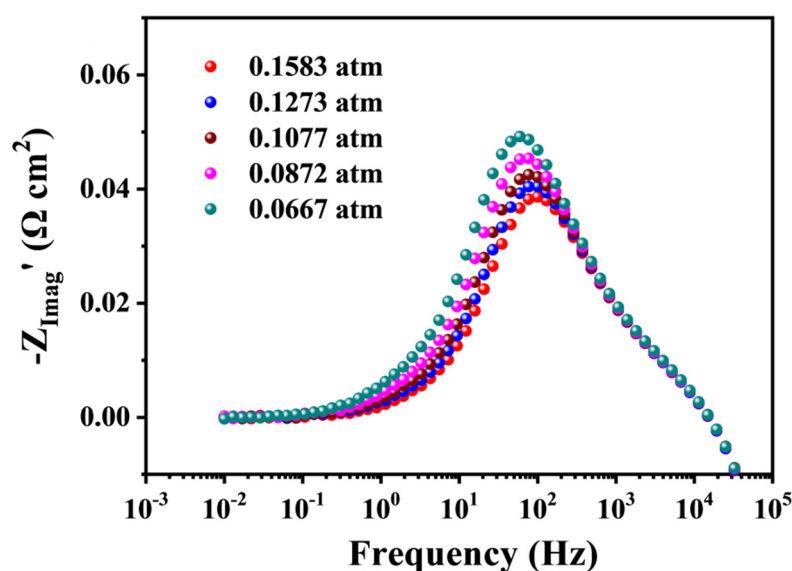

Figure S1. Bode plots of the SFC10 cathode under different oxygen partial pressures.

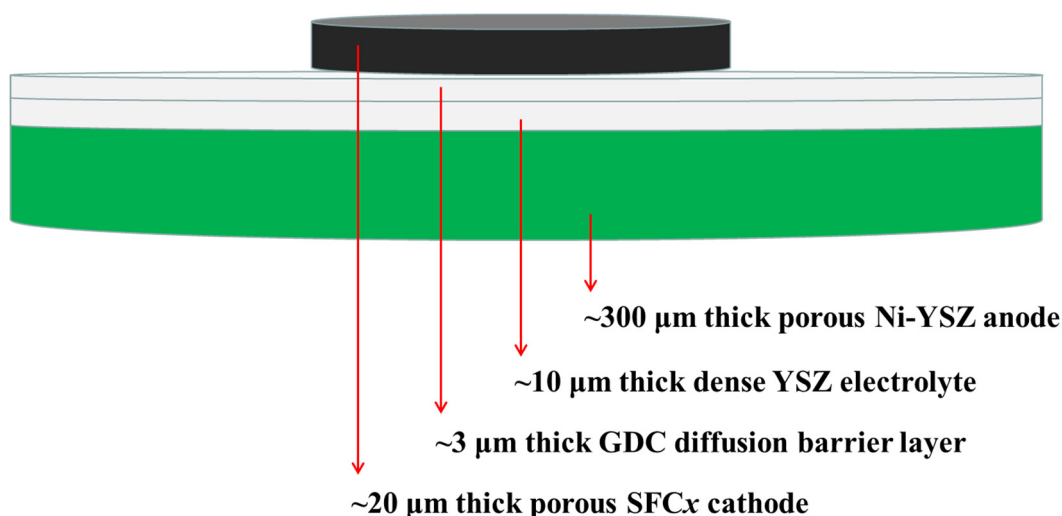

Figure S2. The schematic of the anode-supported single cell.

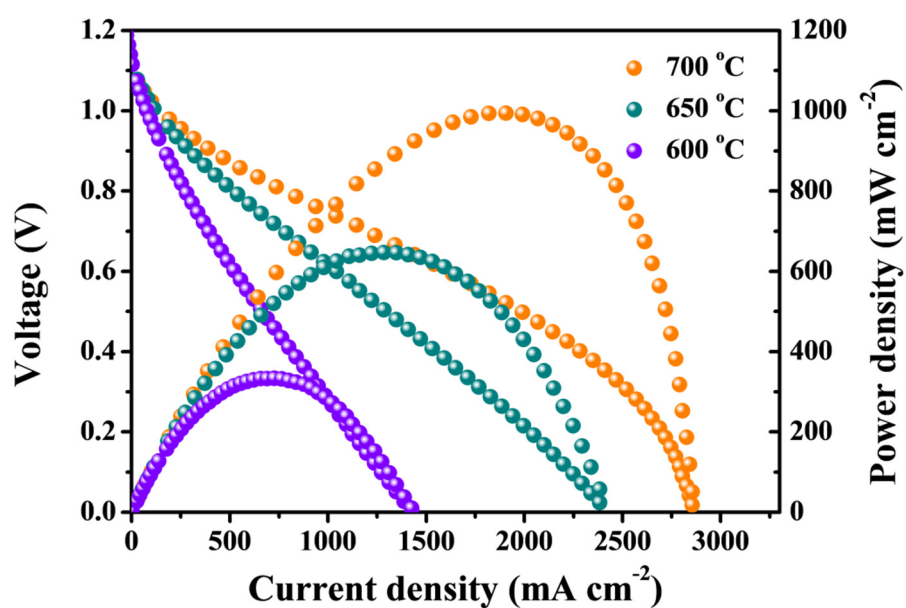

Figure S3.  $I$ - $V$  and  $I$ - $P$  curves of the single cells with SFC10 cathode at 600–700 °C.

Table S1. Lattice parameters of the SFCx oxides.

| Space group          | SFO      | SFC10    | SFC20    |
|----------------------|----------|----------|----------|
|                      | $I4/mmm$ | $I4/mmm$ | $I4/mmm$ |
| $a$ (Å)              | 3.86450  | 3.86100  | 3.85320  |
| $b$ (Å)              | 3.86450  | 3.86100  | 3.85320  |
| $c$ (Å)              | 20.14760 | 20.15580 | 20.14060 |
| $V$ (Å) <sup>3</sup> | 300.892  | 300.469  | 299.031  |
| $\chi^2$             | 1.347    | 1.522    | 3.217    |
| $R_{wp}$ (%)         | 5.166    | 4.698    | 6.962    |
| $R_p$ (%)            | 4.099    | 3.734    | 5.044    |
